# Supplementary material for: Investigating and managing neonatal seizures in the UK: an explanatory sequential mixed methods approach
Source: PubMed Central journal article supplement (PMC6986085; doi:10.1186/s12887-020-1918-4), 2020-01-28
Supplement: 12887_2020_1918_MOESM1_ESM.pdf [file 12887_2020_1918_MOESM1_ESM.pdf]

## Survey on Treatments of Neonatal Seizures in the UK

Thank-you for completing this questionnaire on the treatment of neonatal seizures. Ethical approval has been gained from the University of Sheffield. This work forms part of a MSc degree for Lucy Gosling, Medical Student.

All answers will be treated confidentiality, and we will not publish your unit's name in any reports written.

Name:

What type of unit do you work at?

Which centre do you work in?

1. Do you treat clinical seizures, i.e. where there is no available CFM / aEEG / EEG data to confirm abnormal movements are seizures?

Yes  No  Sometimes

2. Do you treat electrical seizures (i.e. diagnosed on aEEG / CFM / EEG) which do not have any clinical features to see?

Yes  No  Sometimes

3. Do you think electrical seizures are:

As important as clinical seizures  More important than clinical seizures  Less important than clinical seizures  I don't know

4. Do you think seizures themselves cause harm to the brain / development (i.e. not related to apnoea / hypoxia and independent of the underlying cause)?

Yes (Go to Q5)  No (Go to Q6)  I don't know (Go to Q6)

5. If yes, please explain why (please use back of paper if necessary):

6. Do you routinely use cerebral function monitoring (aEEG) for monitoring neonates at high risk of seizures or those having recurrent seizures?

Yes, we use it in all neonates at risk of seizures  We use it only in those with HIE  No, we don't use it at all  We use it in selected cases only, HIE and non-HIE  I don't know

7. What is your first line anti-epileptic drug (and dose):

8. What other drugs do you use routinely to treat neonatal seizures?

|                        |                          |             |                          |
|------------------------|--------------------------|-------------|--------------------------|
| Phenobarbital          | <input type="checkbox"/> | Phenytoin   | <input type="checkbox"/> |
| Levetiracetam (Keppra) | <input type="checkbox"/> | Diazepam    | <input type="checkbox"/> |
| Lorazepam              | <input type="checkbox"/> | Midazolam   | <input type="checkbox"/> |
| Lignocaine             | <input type="checkbox"/> | Paraldehyde | <input type="checkbox"/> |

Others (please state):

9. With reference to phenobarbital, do you think it is...

|                                        |                          |                                              |                          |                                     |                          |
|----------------------------------------|--------------------------|----------------------------------------------|--------------------------|-------------------------------------|--------------------------|
| Very effective at<br>treating seizures | <input type="checkbox"/> | Not at all effective<br>at treating seizures | <input type="checkbox"/> | Stops some<br>seizures, but not all | <input type="checkbox"/> |
|----------------------------------------|--------------------------|----------------------------------------------|--------------------------|-------------------------------------|--------------------------|

10. Have you tried Levetiracetam for treatment of neonatal seizures?

|                    |                          |                   |                          |
|--------------------|--------------------------|-------------------|--------------------------|
| Yes<br>(Go to Q11) | <input type="checkbox"/> | No<br>(Go to Q13) | <input type="checkbox"/> |
|--------------------|--------------------------|-------------------|--------------------------|

11. Do you levetiracetam (Keppra) is...

|                                        |                          |                                              |                          |                                     |                          |
|----------------------------------------|--------------------------|----------------------------------------------|--------------------------|-------------------------------------|--------------------------|
| Very effective at<br>treating seizures | <input type="checkbox"/> | Not at all effective<br>at treating seizures | <input type="checkbox"/> | Stops some<br>seizures. but not all | <input type="checkbox"/> |
|----------------------------------------|--------------------------|----------------------------------------------|--------------------------|-------------------------------------|--------------------------|

12. Compared to phenobarbital, do you think levetiracetam is:

|                              |                          |                             |                          |                                    |                          |                    |                          |
|------------------------------|--------------------------|-----------------------------|--------------------------|------------------------------------|--------------------------|--------------------|--------------------------|
| Better than<br>phenobarbital | <input type="checkbox"/> | As good as<br>phenobarbital | <input type="checkbox"/> | Less good<br>than<br>phenobarbital | <input type="checkbox"/> | I<br>don't<br>know | <input type="checkbox"/> |
|------------------------------|--------------------------|-----------------------------|--------------------------|------------------------------------|--------------------------|--------------------|--------------------------|

13. What side effects are you worried about / have you seen with levetiracetam in neonates?

14. Do you have a seizure treatment guideline? Yes  No

15. If yes, will you send us a copy of your guideline? Yes  No

16. Would you be willing to agree to an interview about your thoughts on treating neonatal seizures in more detail?

Yes  No

If yes to Q15 or Q16, please provide contact phone number or email:
